# Supplementary material for: Cation, magnetic, and charge ordering in MnFe3O5
Source: PubMed Central journal article supplement — J Mater Chem C Mater. 2018 Jan 16;6(13):3271–5. doi: 10.1039/c8tc00053k (PMC6003543; doi:10.1039/c8tc00053k), 2018-01-16
Supplement: TC-006-C8TC00053K-s001.pdf [file TC-006-C8TC00053K-s001.pdf]

## Supplementary Information

### Cation, magnetic, and charge ordering in MnFe<sub>3</sub>O<sub>5</sub>

K. H. Hong,<sup>a</sup> A. M. Arevalo-Lopez,<sup>b</sup> M. Coduri,<sup>c</sup> G. M. McNally<sup>a</sup> and J. P. Attfield<sup>\*a</sup>

<sup>a</sup> Centre for Science at Extreme Conditions and School of Chemistry, University of Edinburgh, Mayfield Road, Edinburgh EH9 3JZ, UK.

<sup>b</sup> Univ. Lille, CNRS, Centrale Lille, ENSCL, Univ. Artois, UMR 8181 - UCCS - Unité de Catalyse et Chimie du Solide, F-59000 Lille, France

<sup>c</sup> European Synchrotron Radiation Facility 71 avenue des Martyrs 38000, Grenoble, France

Table 1. Lattice parameters, atomic coordinates, and isotropic thermal displacements from neutron refinements in *Cmcm* space group of MnFe<sub>3</sub>O<sub>5</sub> at 5 K. Estimated standard deviations for independent variables are shown in parentheses. ( $R_{wp} = 12.9\%$  and  $R_p = 12.6\%$ )

| $a/\text{Å}$ |            | $b/\text{Å}$ |            | $c/\text{Å}$ |                        | Volume / $\text{Å}^3$ |  |
|--------------|------------|--------------|------------|--------------|------------------------|-----------------------|--|
| 2.9017(3)    |            | 9.8928(7)    |            | 12.6083(11)  |                        | 361.94(5)             |  |
| Atom         | Site       | $x$          | $y$        | $z$          | Occupancy <sup>a</sup> | $B_{iso}/\text{Å}^2$  |  |
| Fe1          | 8 <i>f</i> | ½            | 0.2345(4)  | 0.1131(3)    | 1                      | 2.42(12)              |  |
| Fe2/Mn2      | 4 <i>a</i> | 0            | 0          | 0            | 0.995(4)/0.005(4)      | 2.42(12)              |  |
| Mn/Fe        | 4 <i>c</i> | 0            | 0.4812(16) | ¼            | 0.937(4)/0.063(4)      | 2.42(12)              |  |
| O1           | 4 <i>c</i> | ½            | 0.3188(9)  | ¼            | 1                      | 3.00(15)              |  |
| O2           | 8 <i>f</i> | 0            | 0.3469(6)  | 0.0473(7)    | 1                      | 3.00(15)              |  |
| O3           | 8 <i>f</i> | 0            | 0.0992(6)  | 0.1410(7)    | 1                      | 3.00(15)              |  |

<sup>a</sup> Variable occupancies were refined against 400 K neutron data and were fixed in lower temperature refinements.

Table 2. Metal-oxygen bond lengths and metal-metal distances, with mean values  $\langle \rangle$  shown for MnFe<sub>3</sub>O<sub>5</sub> at 5 K.

| Bond                           | Distance (Å) | Bond                           | Distance (Å) |
|--------------------------------|--------------|--------------------------------|--------------|
| Mn-O1 (x 2)                    | 2.165(14)    | Fe2-O2 (x 4)                   | 2.180(5)     |
| Mn-O3 (x 4)                    | 2.314(11)    | Fe2-O3 (x 2)                   | 2.031(9)     |
| $\langle \text{Mn-O} \rangle$  | 2.264(5)     | $\langle \text{Fe2-O} \rangle$ | 2.130(3)     |
| Fe1-O1                         | 1.917(6)     | Fe1-Fe1,                       | 2.9015(3)    |
| Fe1-O2                         | 2.177(10)    | Fe2-Fe2,Mn-Mn                  |              |
| Fe1-O2 (x 2)                   | 2.007(6)     | Fe1-Fe2(x 2)                   | 2.989(4)     |
| Fe1-O3 (x 2)                   | 2.005(6)     | Fe1-Fe2(x 4)                   | 3.085(4)     |
| $\langle \text{Fe1-O} \rangle$ | 2.020(3)     |                                |              |

Table 3. Irreducible representations (IrReps) and basis vectors (BV) for Fe1, Fe2 and Mn spin order in MnFe<sub>3</sub>O<sub>5</sub> at 5 K, with propagation vector (0 0 0). The magnetically independent atoms are Fe1 at (½, 0.2345, 0.1131), Fe2 at (0, 0, 0) and Mn1 at (0, 0.4812, ¼). The symmetry related positions are generated by the operators 1: (x, y, z), 2: (-x+½, -y+½, z+½), 3: (-x+1, y, -z+½), 4: (x-½, -y+½, -z+1), 5: (-x, -y, z+½) and 6: (-x, -y+1, z+½). The structure was solved using  $\Gamma_2\psi_3$ ,  $\Gamma_6\psi_8$  and  $\Gamma_6\psi_9$  for Fe1 and Fe2, and  $\Gamma_3\psi_4$ ,  $\Gamma_6\psi_8$  and  $\Gamma_7\psi_{11}$  for Mn1.

| IrReps | $\Gamma_1$ | $\Gamma_2$ | $\Gamma_3$ | $\Gamma_4$ | $\Gamma_5$ | $\Gamma_6$ | $\Gamma_7$ | $\Gamma_8$ |          |             |             |             |
|--------|------------|------------|------------|------------|------------|------------|------------|------------|----------|-------------|-------------|-------------|
| BV     | $\psi_1$   | $\psi_2$   | $\psi_3$   | $\psi_4$   | $\psi_5$   | $\psi_6$   | $\psi_7$   | $\psi_8$   | $\psi_9$ | $\psi_{10}$ | $\psi_{11}$ | $\psi_{12}$ |
| Atoms  | $m_y$      | $m_z$      | $m_x$      | $m_x$      | $m_y$      | $m_z$      | $m_x$      | $m_y$      | $m_z$    | $m_y$       | $m_z$       | $m_x$       |
| Fe1_1  | +          | +          | +          | +          | +          | +          | +          | +          | +        | +           | +           | +           |
| Fe1_2  | -          | +          | -          | -          | -          | +          | +          | +          | -        | +           | -           | +           |
| Fe1_3  | +          | -          | -          | +          | -          | +          | -          | +          | -        | -           | +           | +           |
| Fe1_4  | -          | -          | +          | -          | +          | +          | -          | +          | +        | -           | -           | +           |
| Fe2_1  |            |            | +          |            | +          | +          |            | +          | +        |             |             | +           |
| Fe2_5  |            |            | -          |            | -          | +          |            | +          | -        |             |             | +           |
| Mn1_1  | +          |            |            | +          |            | +          |            | +          |          |             | +           | +           |
| Mn1_6  | -          |            |            | -          |            | +          |            | +          |          |             | -           | +           |

Table 4. The magnetic components and total moment on each magnetic ion in MnFe<sub>3</sub>O<sub>5</sub> between 5 and 300 K.

| Sites              |       | 5 K    | 75 K    | 150 K  | 300 K  |
|--------------------|-------|--------|---------|--------|--------|
| Fe1<br>( $\mu_B$ ) | Total | 3.9(3) | 4.2(2)  | 3.7(1) | 2.4(1) |
|                    | x     | 1.6(1) | 0       | 0      | 0      |
|                    | y     | 1.5(2) | 1.4(1)  | 0      | 0      |
|                    | z     | 3.2(1) | 3.9(1)  | 3.7(1) | 2.4(1) |
| Fe2<br>( $\mu_B$ ) | Total | 3.1(4) | 4.1(1)  | 4.0(1) | 2.7(1) |
|                    | x     | 1.7(1) | 0       | 0      | 0      |
|                    | y     | 1.0(2) | 0       | 0      | 0      |
|                    | z     | 2.4(1) | 4.1(1)  | 4.0(1) | 2.7(1) |
| Mn<br>( $\mu_B$ )  | Total | 3.1(6) | 1.88(2) | 0      | 0      |
|                    | x     | 0      | 0       | 0      | 0      |
|                    | y     | 2.6(3) | 1.88(2) | 0      | 0      |
|                    | z     | 1.7(4) | 0       | 0      | 0      |

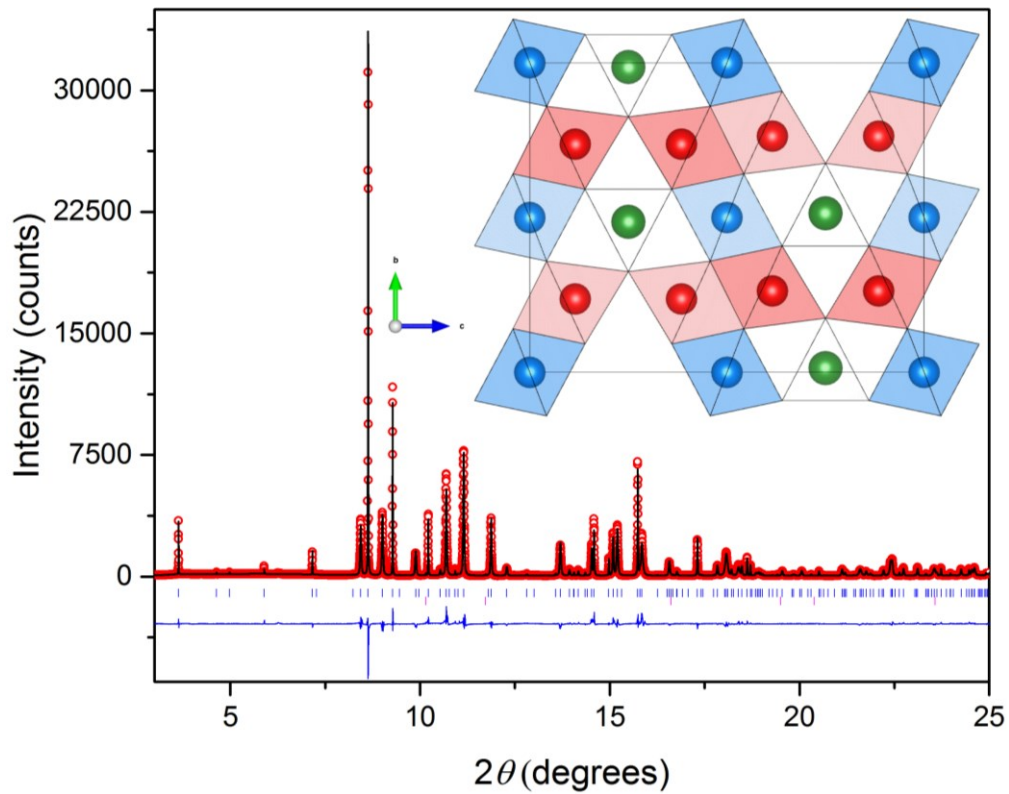

Figure 1. Rietveld fit to synchrotron powder diffraction profiles for  $\text{MnFe}_3\text{O}_5$  at 13 K, with upper tick marks indicating the  $\text{MnFe}_3\text{O}_5$  phase and lower for residual platinum from the sample container during high pressure-temperature synthesis. ( $R_{\text{wp}} = 15.6\%$  and  $R_p = 13.2\%$ ) Insert shows the  $Cmcm$  structure of  $\text{MnFe}_3\text{O}_5$  at 13 K with Fe1 octahedra shown in red, Fe2 in blue and Mn triangular prisms in green. Oxygens are located at the corners of polyhedra.
